1 **The mycotoxin Beauvericin exhibits immunostimulatory effects on**  
2 **dendritic cells via activating the TLR4 signaling pathway**

3 Xiaoli Yang<sup>1</sup>, Shafaqat Ali<sup>1</sup>, Manman Zhao<sup>2</sup>, Lisa Richter<sup>1</sup>, Vanessa Schäfer<sup>1</sup>, Julian  
4 Schliehe-Diecks<sup>3</sup>, Marian Frank<sup>4</sup>, Jing Qi<sup>5</sup>, Pia-Katharina Larsen<sup>6</sup>, Jennifer Skerra<sup>6</sup>, Heba  
5 Islam<sup>7</sup>, Thorsten Wachtmeister<sup>8</sup>, Christina Alter<sup>9</sup>, Anfei Huang<sup>10</sup>, Sanil Bhatia<sup>3</sup>, Karl Köhrer<sup>8</sup>,  
6 Carsten Kirschning<sup>7</sup>, Heike Weighardt<sup>11</sup>, Ulrich Kalinke<sup>6,12</sup>, Rainer Kalscheuer<sup>4</sup>, Markus  
7 Uhrberg<sup>5</sup>, Stefanie Scheu<sup>1</sup>

8

9 <sup>1</sup>Institute of Medical Microbiology and Hospital Hygiene, Heinrich Heine University Düsseldorf,  
10 Düsseldorf, Germany.

11 <sup>2</sup>Institutes of Brain Science, State Key Laboratory of Medical Neurobiology, Fudan University,  
12 Shanghai, China.

13 <sup>3</sup>Department of Pediatric Oncology, Hematology and Clinical Immunology, Medical Faculty,  
14 Heinrich-Heine University Düsseldorf, Düsseldorf, Germany.

15 <sup>4</sup>Institute of Pharmaceutical Biology and Biotechnology, Heinrich Heine University Düsseldorf,  
16 Düsseldorf, Germany.

17 <sup>5</sup>Institute for Transplantation Diagnostics and Cell Therapeutics, Medical Faculty,  
18 Heinrich-Heine University Düsseldorf, Düsseldorf, Germany.

19 <sup>6</sup>Institute for Experimental Infection Research, TWINCORE, Centre for Experimental and  
20 Clinical Infection Research, a joint venture between the Helmholtz Centre for Infection  
21 Research and the Hannover Medical School, Hannover, Germany.

22 <sup>7</sup>Institute of Medical Microbiology, University Hospital of Essen, University of Duisburg-Essen,  
23 Essen, Germany.

24 <sup>8</sup>Biological and Medical Research Center (BMFZ), Medical Faculty, Heinrich Heine University  
25 Düsseldorf, Düsseldorf, Germany.

26 <sup>9</sup>Institute of Molecular Cardiology, Medical Faculty, Heinrich Heine University Düsseldorf,  
27 Düsseldorf, Germany.

28 <sup>10</sup>Julius-Maximilians-Universität of Würzburg (JMU), Würzburg, Germany.

29 <sup>11</sup>Immunology and Environment, Life & Medical Sciences (LIMES) Institute, University of Bonn,  
30 Bonn, Germany.

31 <sup>12</sup>Cluster of Excellence - Resolving Infection Susceptibility (RESIST, EXC 2155), Hannover  
32 Medical School, Hannover, Germany.

33

## 34 **Abstract**

35 Beauvericin (BEA), a mycotoxin of the enniatin family produced by various toxigenic fungi, has  
36 been attributed multiple biological activities such as anti-cancer, anti-inflammatory, and  
37 anti-microbial functions. However, effects of BEA on dendritic cells remain unknown so far.  
38 Here, we identified effects of BEA on murine granulocyte–macrophage colony-stimulating  
39 factor (GM-CSF)-cultured bone marrow derived dendritic cells (BMDCs) and the underlying  
40 molecular mechanisms. BEA potently activates BMDCs as signified by elevated IL-12 and  
41 CD86 expression. Multiplex immunoassays performed on myeloid differentiation primary  
42 response 88 (MyD88) and toll/interleukin-1 receptor (TIR) domain containing adaptor inducing  
43 interferon beta (TRIF) single or double deficient BMDCs indicate that BEA induces  
44 inflammatory cytokine and chemokine production in a MyD88/TRIF dependent manner.  
45 Furthermore, we found that BEA was not able to induce IL-12 or IFN $\beta$  production in Toll-like  
46 receptor 4 (*Tlr4*)-deficient BMDCs, whereas induction of these cytokines was not  
47 compromised in *Tlr3/7/9* deficient BMDCs. This suggests that TLR4 might be the functional  
48 target of BEA on BMDCs. Consistently, in luciferase reporter assays BEA stimulation  
49 significantly promotes NF- $\kappa$ B activation in mTLR4/CD14/MD2 overexpressing but not control  
50 HEK-293 cells. RNA-sequencing analyses further confirmed that BEA induces transcriptional  
51 changes associated with the TLR4 signaling pathway. Together, these results identify TLR4 as  
52 a cellular BEA sensor and define BEA as a potent activator of BMDCs, implying that this  
53 compound can be exploited as a promising candidate structure for vaccine adjuvants or  
54 cancer immunotherapies.

55

## 56 Introduction

57 Dendritic cells (DCs) represent a heterogeneous family of immune cells that link innate  
58 and adaptive immunity. They can be classified into two main subtypes: plasmacytoid DCs and  
59 conventional DCs, the latter being considered the most potent antigen presenting cells (1-3).  
60 DCs are key players in the immune responses, residing in peripheral organs in an immature  
61 state and acting as sentinels for a wide array of “danger” signals. These signals include  
62 danger-associated molecular patterns (DAMPs) or pathogen-associated microbial patterns  
63 (PAMPs), which are recognized by conserved pattern recognition receptors (PRRs) such as  
64 the Toll-like receptors (TLRs), RIG-I-like receptors (RLRs) and cytoplasmic DNA receptors (4).  
65 Up to date, 10 (TLR1-10) and 12 (TLR1-9, 11-13) functional TLRs are identified in humans and  
66 mice, respectively and each is triggered by a distinct set of PAMPs. Based on the distinctive  
67 adaptors in these pathways, TLR signaling can be subdivided into two categories: signaling  
68 dependent on the MyD88-dependent pathway and signaling dependent on the  
69 TRIF-dependent pathway. Most TLRs interact intracellularly with MyD88, except TLR3 which  
70 transduces activating signals exclusively via TRIF. Effective TLR4 signaling depends on both  
71 adaptor molecules, TRIF and MyD88 (5).

72 Upon recognition of PAMPs, the TIR domain-containing adaptor proteins MyD88 and/or  
73 TRIF are recruited to the TLRs, and initiate signal transduction pathways that culminate in the  
74 activation of NF- $\kappa$ B, interferon regulatory factors (IRFs), and mitogen-activated protein kinase  
75 (MAP) kinases to upregulate costimulatory molecules (CD40, CD80 and CD86), inflammatory  
76 cytokines (e.g. IL-12, IL-6, and TNF), chemokines (RANTES, IP-10, ENA78, etc.) and type I  
77 interferons (IFNs) that ultimately protect the host from microbial infection (6, 7). IL-12,  
78 composed of p35 and p40 subunits, is the critical factor for Th1 immune responses in the  
79 defense against bacterial and viral infection as well as cancer cells (8, 9).  
80 Beauvericin is a cyclic hexadepsipeptide, belonging to the enniatin family and is produced by  
81 various fungi, such as *Beaveria bassiana* and *Fusarium spp.* (10, 11). As a mycotoxin, BEA is  
82 a very common contaminant of cereal and cereal based products (12, 13), but it is also found  
83 in other products such as nuts and coffee (14). Multiple and divers properties of BEA have

84 been reported such as enhancement of pesticide sensitivity (15), anti-bacterial activity against  
85 Gram-positive and Gram-negative bacteria (16), anti-viral activity against human  
86 immunodeficiency virus type-1 integrase (17), and cytotoxic activity against melanoma cells  
87 (18). BEA can also cause cell apoptosis by inducing reactive oxygen species (ROS)  
88 production (19). Moreover, BEA shows anti-inflammatory activity in macrophages by inhibiting  
89 the NF- $\kappa$ B pathway (20). Although these various properties have been described for BEA, its  
90 impact on DCs has not been determined, yet. Here we found that Beauvericin shows  
91 immunostimulatory effects on BMDCs via activation of a TLR4 dependent signaling pathway.

## 92 **Material and Methods**

### 93 **Mice**

94 Wild type C57BL/6N and IL-12p40/GFP reporter mice (21) were used for GM-CSF culture of  
95 bone marrow cells. OT-II transgenic mice which express an OVA-specific, MHC class  
96 II-restricted TCR were used for T cell activation assays. Bone marrow from *Tlr3/7/9*<sup>-/-</sup> mice and  
97 *Tlr4*<sup>-/-</sup> mice were kindly provided by Prof. Carsten Kirschning. Bone marrow from *Myd88*<sup>-/-</sup> and  
98 *Myd88*<sup>-/-</sup> *Trif*<sup>-/-</sup> mice was shared by Dr. Heike Weighardt and Prof. Ulrich Kalinke, respectively.  
99 No experiments on live animals were performed. Mice were euthanized by cervical dislocation  
100 before bone marrow was harvested. The euthanasia method used is in strict accordance with  
101 accepted norms of veterinary best practice. Animals were kept under specific pathogen-free  
102 conditions in the animal research facilities of the Universities of Düsseldorf, Essen-Duisburg,  
103 Bonn and the TWINCORE strictly according to German animal welfare guidelines.

### 104 **GM-CSF cell cultures and stimulation conditions**

105  $2 \times 10^6$  bone marrow cells were cultured in non-treated 10cm plates (Sarstedt) in 10 ml VLE  
106 DMEM (Biochrom) containing 10% heat-inactivated FCS (Sigma-Aldrich), 0.1%  
107 2-mercaptoethanol (Thermo Fischer Scientific), and GM-CSF and kept for 9 days. 10  $\mu$ ml  
108 GM-CSF containing medium was added to the plates at day 3. On day 6 10  $\mu$ ml medium was  
109 carefully removed and centrifuged. The cell pellet was resuspended in 10  $\mu$ ml medium and  
110 added to the dish. On day 9 BMDCs were used for experiments.

111 For cytokine expression analyses, BMDCs were seeded ( $1 \times 10^6$  cells/well) on a 24-well plate  
112 and were stimulated with BEA (purified by the lab of Prof. Rainer Kalscheuer, or purchased  
113 from Cayman Chemicals), CpG 2216 (TIB MOLBIOL), LPS (*Escherichia coli* O127:B8, Sigma),  
114 cGAMP (InvivoGen), R848 (Alexis Biochemicals), Poly I:C (InvivoGen), or Pam3csk4  
115 (InvivoGen). After 24 hours, cell culture supernatants were collected for cytokine detection.

#### 116 **Polymyxin B (PMB) neutralization assay**

117 BMDCs were seeded ( $1 \times 10^6$  cells/ml) on a 24-well plate and were stimulated with BEA  
118 (purchased from Cayman Chemicals) or LPS (*Escherichia coli* O127:B8, Sigma) with or  
119 without 100 $\mu$ g/ml PMB (InvivoGen). After 16 hours of incubation at 37°C, IL-12p40/GFP  
120 expression was analyzed by flow cytometry. Alternatively, after 24 hours, cell culture  
121 supernatants were collected and the IL-12p70 and IFN $\beta$  content was determined by ELISA  
122 assays.

#### 123 **Flow cytometry and cell sorting**

124 For cell surface staining, fluorochrome-conjugated monoclonal antibodies against mouse  
125 CD3e (clone 145-2C11), CD19 (clone 1D3), CD4 (clone RM4-5), and MHC II (clone  
126 N5/114.15.2) from BD Biosciences, and CD3e (clone 145-2C11), CD86 (clone GL-1) and  
127 CD11c (clone N418) from BioLegend were used. For intracellular staining, cells were first  
128 stained for surface markers and then fixed and permeabilized using Intracellular Fixation and  
129 Permeabilization Buffer Set (eBioscience) before incubation with fluorochrome-conjugated  
130 mAbs against mouse IFN $\gamma$  (clone XMG1.2, BD Bioscience). Flow cytometry was performed on  
131 LSRFortessa (BD Biosciences) or FACSCanto II (BD Biosciences) cytometers. The flow  
132 cytometry data was analyzed using FlowJo V10.5. For RNA sequencing experiments live,  
133 single, CD3 $^+$ , CD19 $^+$ , CD11c $^+$  and MHCII $^{\text{high}}$  BMDCs were FACS purified using FACS Aria III  
134 (BD Biosciences).

#### 135 **qRT-PCR**

136 RNA isolation was performed using Macherey-Nagel™ NucleoSpin™ RNA Plus kit

137 (Macherey-Nagel™). Complementary DNA synthesis was done by using the SuperScript™ III  
138 Reverse Transcriptase (Invitrogen) according to the manufacturer's instructions. Real-time  
139 PCR was performed with 5x MESA Green (Eurogentec) on Bio-Rad CFX 96 Realtime PCR  
140 system. Primers used were as follows: *β-actin*: 5'-TGACAGGATGCAGAAGGAGA-3',  
141 5'-CGCTCAGGAGGAGCAATG-3'; *IL-12p40*: 5'-ACAGCACCAGCTTCTTCATCAG-3',  
142 5'-TCTTCAAAGGCTTCATCTGCAA-3'; *IFNβ*: 5'-CAGGCA ACCTTT AAG CATCA-3',  
143 5'-CCTTTGACCTTTCAAATGCAG-3' *TNF*: 5'-TTGAGATCCATGCCGTTG-3',  
144 5'-CTGTAGCCCACGTCGTAGC-3'; *IL-6*: 5'-CCAGGTAGCTATGGTACTCCAGAA-3',  
145 5'-GCTACCAAACCTGGATATAATCAGGA-3'

#### 146 **RNA sequencing and analysis**

147 RNA from sorted BMDCs was extracted using the Macherey-Nagel™ NucleoSpin™ RNA Plus  
148 kit (Macherey-Nagel™) and quantified using the Qubit RNA HS Assay Kit (Thermo Fisher  
149 Scientific). Quality was measured by capillary electrophoresis using the Fragment Analyzer  
150 and the 'Total RNA Standard Sensitivity Assay' (Agilent Technologies, Inc. Santa Clara, USA).  
151 All samples in this study showed high quality RNA Quality Numbers (RQN > 9.4). Library  
152 preparation was performed according to the manufacturer's protocol using the 'VAHTS™  
153 Stranded mRNA-Seq Library Prep Kit' for Illumina®. Briefly, 500 ng total RNA were used for  
154 mRNA capturing, fragmentation, the synthesis of cDNA, adapter ligation and library  
155 amplification. Bead purified libraries were normalized and finally sequenced on the  
156 NextSeq550 system (Illumina Inc. San Diego, USA) with a read setup of 1x76 bp. The  
157 bcl2fastq2 tool was used to convert the bcl files to fastq files.

158 The reads of all probes were adapter trimmed (Illumina TruSeq) and the clean reads were  
159 analyzed using FastQC software to identify potential issues with data quality. The clean reads  
160 were then mapped to the mouse reference genome (*Mus musculus*, GRCm39/mm39) using  
161 STAR software. The percentage of uniquely mapped reads were greater than 80%. The  
162 uniquely mapped reads to each gene were counted using featureCounts. In order to assess  
163 the sample quality, we performed the principal component analysis (PCA) and hierarchical  
164 clustering for all samples. No batch effect was detected. The differently expressed genes

165 (DEGs) ( $|\log_2FC| \geq 1$ ,  $FDR < 0.05$ ) between non-stimulation and BEA, LPS or BEA with LPS  
166 stimulation following the previously described methods (22) were identified using DEseq2  
167 package. DEGs expression was visualized as clustered heat maps using pheatmap package.  
168 The functional enrichment analysis (KEGG pathways and GO terms) of DEGs was carried out  
169 using enrichR package. Gene Set Enrichment Analysis (GSEA, Version 4.0.3) was used to  
170 identify enriched functional gene sets based upon the definitions of the Molecular Signatures  
171 Database (23, 24). The included gene set collections were “C2 curated gene sets”, “C5  
172 ontology gene sets” and “C7 immunologic signature gene sets”. An enrichment map of  
173 significantly enriched gene sets was produced via Cytoscape (Version 3.8.0) (25) and the  
174 GSEA Enrichment Map plugin (26). Since Cytoscape defines a FDR of 0.25 as significant, this  
175 value was used as a cut off for inclusion into the network. In the enrichment networks, nodes  
176 represent gene sets, while edges represent mutual overlap between gene sets. Genes with  
177 overlapping genes and functional annotations were clustered manually to highlight the  
178 functional results. These clusters were encircled and labeled with an encompassing  
179 terminology. To achieve a simplified and more precise figure all clusters with less than three  
180 signatures were discarded from the network.

### 181 **Multiplex immunoassay**

182 Cell culture supernatants were assessed for chemokine and cytokine concentrations. The  
183 ProcartaPlex Mouse Cytokine & Chemokine Panel 1A 36-plex (Invitrogen by Thermo Fisher  
184 Scientific) was used to measure the concentrations of IFN $\alpha$ , IFN $\gamma$ , IL-12p70, IL-1 $\beta$ , IL-2, TNF,  
185 GM-CSF, IL-18, IL-17A, IL-22, IL-23, IL-27, IL-9, IL-15/IL-15R, IL-13, IL-4, IL-5, IL-6, IL-10,  
186 Eotaxin (CCL11), IL-28, IL-3, LIF, IL-1 $\alpha$ , IL-31, GRO- $\alpha$  (CXCL1), MIP-1 $\alpha$  (CCL3), IP-10  
187 (CXCL10), MCP-1 (CCL2), MCP-3 (CCL7), MIP-1 $\beta$  (CCL4), MIP-2 (CXCL2), RANTES (CCL5),  
188 G-CSF, M-CSF, and ENA-78 (CXCL5) in cell culture supernatants, according to the  
189 manufacturer’s instructions. Plates were read using the Bio-Plex 200 Systems (Bio-Rad,  
190 USA).

191 **ELISA**

192 Cell culture supernatants from BMDCs were analyzed by ELISA for IL-12p70 (R&D) and IFN $\beta$   
193 (Invitrogen). Plates were read using a Tecan Sunrise microplate reader at 450 nm, and the  
194 background was subtracted at 570 nm.

195 **Luciferase reporter assay**

196 HEK-293 cells stably expressing TLR4/MD2/CD14 were purchased from Invivogen. Cells were  
197 seeded at  $3.5 \times 10^4$  live cell/well in 96 well plates overnight and were transfected with  
198 NF- $\kappa$ B-luciferase reporter plasmid (50 ng/well) and Renilla plasmid (5 ng/well) with transfection  
199 reagent jetPRIME (Polyplus-transfection Biotechnology) for 24 hours. Then cells were  
200 stimulated with different concentrations of BEA (2.5  $\mu$ M, 5  $\mu$ M and 7.5  $\mu$ M) or LPS (1  $\mu$ g/ml) as  
201 a positive control. After 24 hours of stimulation, the supernatant was discarded, and cells were  
202 washed with PBS. 50  $\mu$ L of lysis buffer (Promega) was added and cells were lysed at room  
203 temperature for 15 min on a shaker and luciferase activity was measured with the Dual-Glo  
204 Luciferase Assay (Promega) in a Mithras LB 940 multimode microplate reader.

205 **T cell activation assay**

206 For BMDC / T cell coculture, BMDCs were treated with 2.5  $\mu$ M, 5  $\mu$ M, 7.5  $\mu$ M BEA for 24 hours  
207 and then washed twice with PBS to remove residual BEA before use in subsequent culture.  
208 Naive CD4<sup>+</sup> T cells were purified from spleens of OT II mice by MACS (Miltenyi Biotec)  
209 according to the manufacturer's protocol. Briefly, cells were Fc-blocked and incubated with  
210 biotinylated anti-CD4 antibodies (BD Pharmingen). Subsequently, magnetic anti-biotin beads  
211 (Miltenyi Biotec) were added and CD4<sup>+</sup> T cells were positively selected by running cells along  
212 a MACS magnet. CD4<sup>+</sup> T cells were labeled with CellTrace Violet (Thermo Fisher Scientific)  
213 and afterwards cultured with untreated or BEA treated BMDCs at a 10:1 ratio in 96 well round  
214 bottom plates for 3 days and 5 days, respectively. Cell proliferation was measured at day 3 by  
215 flow cytometry. At day 5, cell culture supernatants were collected and stored at -80°C. For  
216 intracellular detection of IFN $\gamma$ , Brefeldin A (BD Biosciences) was added to the cells in the last 6  
217 hours before harvesting of the cells at day 5.



## 218 **Statistical analysis**

219 GraphPad Prism 9.0 software was used for data analysis. Data are represented as mean ±  
220 SEM. For analyzing statistical significance between multiple groups, a one-way ANOVA with  
221 Dunnett's multiple comparisons test was used. For analyzing statistical significance for  
222 comparisons of more than two groups with two or more stimulations, two-way ANOVA with  
223 Sidak's multiple comparisons test was used, all p values < 0.05 were considered as  
224 statistically significant.

225

## 226 **Results**

### 227 **BEA activates BMDCs to increase inflammatory cytokine production and costimulatory** 228 **ligand expression.**

229 To study the effects of BEA on BMDCs, cells from IL-12p40/GFP reporter mice were treated  
230 with various concentrations of BEA in the presence or absence of suboptimal concentrations of  
231 LPS and CpG. BMDC activation was determined by IL-12p40/GFP and CD86 expression. BEA  
232 alone potently activated BMDCs leading to enhanced IL-12p40 and CD86 expression (Figure  
233 1A, B). As expected, BEA treatment can also enhance activation of LPS or CpG stimulated  
234 BMDCs leading to further increased IL-12p40 and CD86 expression (Figure 1A, B). In addition,  
235 we also detected significantly increased production of the inflammatory cytokines IL-12p40,  
236 IFN $\beta$ , TNF and IL-6 in response to BEA stimulation by Real-time PCR with maximum levels  
237 reached at 6 hours post stimulation (Figure 1C). Taken together, BEA can upregulate IL-12 and  
238 other pro-inflammatory cytokines together with CD86 levels in BMDCs, indicating that BEA  
239 might be a potent BMDC activator.

### 240 **BEA promotes DC-mediated CD4<sup>+</sup> T cell proliferation.**

241 Next, we aimed at investigating whether BEA could enhance the ability of BMDCs to induce T  
242 cell proliferation. BMDCs were cultured in the presence or absence of various concentrations  
243 of BEA for 24 hours and then cells were washed thoroughly as previous studies have shown

244 that BEA significantly inhibits T cell proliferation in TNBS-induced experimental colitis (27).  
245 Afterwards, untreated and treated BMDCs were co-cultured with OT II TCR transgenic naive  
246 CD4<sup>+</sup> T cells for 3 days. While untreated BMDCs induced T cell proliferation without BEA  
247 stimulation to a certain level, T cell co-culture with BEA treated BMDCs led to increased  
248 numbers of T cell divisions (Figure 2A). Furthermore, we also analyzed intracellular IFN $\gamma$   
249 production of CD4<sup>+</sup> T cells. While untreated and BEA treated BMDCs showed similar  
250 percentages of IFN $\gamma$  producing CD4<sup>+</sup> T cells (Figure 2B), significantly higher IFN $\gamma$  levels were  
251 detected in supernatants of T cells that were co-cultured with BEA activated BMDCs for 5 days  
252 than with untreated BMDCs (Figure 2C). The increased amounts of IFN $\gamma$  in the supernatant of  
253 T cells co-cultured with BEA treated BMDCs is due to increased T cell numbers of IFN $\gamma$   
254 producing T cells but not enhanced capacity for IFN $\gamma$  production on a per cell basis. This  
255 suggests that BEA can enhance the ability of BMDCs to induce T cell proliferation, whereas it  
256 does not have an impact on differentiation or induction on cytokine production in individual  
257 cells. Taken together, BEA can induce BMDC-mediated CD4<sup>+</sup> T cell proliferation.

#### 258 **BEA mediated effects on BMDCs is not due to LPS contamination.**

259 The purity of BEA isolated from *Fusarium spp.* by the Institute of Pharmaceutical Biology and  
260 Biotechnology (Prof. Rainer Kalscheuer) and BEA purchased from Cayman Chemicals was  
261 above 95% as defined by HPLC-UV (data not shown). To further confirm this effect was not a  
262 result of endotoxin contamination, BMDCs derived from IL-12p40/GFP reporter mice were  
263 stimulated by indicated concentrations of BEA or LPS with or without PMB, which blocks the  
264 biological effects of LPS through binding to lipid A (28, 29). After 16 hours of stimulation,  
265 IL-12p40/GFP expression by BMDCs was analyzed by flow cytometry. PMB effectively  
266 blocked the LPS mediated activation of BMDCs resulting in undetectable IL-12p40 (Figure  
267 3A-B) and IL-12p70 levels (Figure 3C). However, amounts of IL-12p40 and IL-12p70 were  
268 comparable after BEA stimulation with or without additional PMB treatment (Figure 3A-C). This  
269 result demonstrated that production of IL-12 by BEA treated BMDCs is unlikely to result from  
270 any contamination of BEA with LPS.

271 **BEA induces BMDC cytokine production in a MyD88 and TRIF dependent way.**

272 MyD88 and TRIF are critical adaptors for TLR induced production of pro-inflammatory  
273 cytokines such as IL-12, TNF, IL-6 and IFN $\beta$  by DCs (30, 31). Therefore, we aimed to  
274 investigate whether IL-12 and IFN $\beta$  production by BEA stimulation are MyD88 or  
275 TRIF-dependent. To this end, BMDCs were generated from *Myd88*<sup>-/-</sup> and *Myd88*<sup>-/-</sup> *Trif*<sup>-/-</sup> mice  
276 and stimulated with BEA, LPS or cGAMP, the latter serving as a positive,  
277 MyD88/TRIF-independent stimulation control. After 24 hours stimulation, cell supernatant was  
278 collected to assess IL-12 and IFN $\beta$  production by ELISA. In this experiment, cGAMP can  
279 induce IFN $\beta$  production in WT and *Myd88*<sup>-/-</sup> or *Myd88*<sup>-/-</sup> *Trif*<sup>-/-</sup> BMDCs. As expected, neither  
280 *Myd88*<sup>-/-</sup> nor *Myd88*<sup>-/-</sup> *Trif*<sup>-/-</sup> BMDCs released detectable amounts of IL-12 upon LPS stimulation.  
281 Production of IFN $\beta$  was significantly diminished but still detectable in *Myd88*<sup>-/-</sup> BMDCs,  
282 whereas it was undetectable in *Myd88*<sup>-/-</sup> *Trif*<sup>-/-</sup> BMDCs. Similarly, BEA did not induce IL-12p70  
283 production in either *Myd88*<sup>-/-</sup> BMDCs or *Myd88*<sup>-/-</sup> *Trif*<sup>-/-</sup> BMDCs while IFN $\beta$  production was  
284 significantly decreased in *Myd88*<sup>-/-</sup> BMDCs and undetectable in *Myd88*<sup>-/-</sup> *Trif*<sup>-/-</sup> BMDCs (Figure  
285 4A). Furthermore, we determined production of other cytokines and chemokines by multiplex  
286 immunoassay. Production of the inflammatory cytokines TNF, IL-6, IL-1 $\beta$ , IL-18, IL-27 and  
287 IL-10 (Figure 4B) and the chemokines GRO- $\alpha$ , MCP-3, ENA-78, MIP-1 $\beta$  and RANTES (Figure  
288 4C) was significantly decreased in BEA simulated *Myd88*<sup>-/-</sup> BMDCs and even lower in BEA  
289 simulated *Myd88*<sup>-/-</sup> *Trif*<sup>-/-</sup> BMDCs. However, production of IP-10 induced by LPS in *Myd88*<sup>-/-</sup>  
290 BMDCs was similar to WT BMDCs, but was markedly decreased in LPS stimulated *Myd88*<sup>-/-</sup>  
291 *Trif*<sup>-/-</sup> BMDCs. Such findings are consistent with studies reporting that expression of IP-10 by  
292 LPS-stimulated bone-marrow-derived macrophages is mediated through a TRIF-dependent  
293 but MyD88-independent pathway (32). Interestingly, similar results were observed in BEA  
294 stimulated *Myd88*<sup>-/-</sup> BMDCs and *Myd88*<sup>-/-</sup> *Trif*<sup>-/-</sup> BMDCs. Thus, the effects of BEA on BMDCs  
295 cytokine and chemokine expression profiles are mediated via activation of MyD88 and TRIF  
296 signaling pathways as similarly detected after LPS-stimulation.

297 **BEA activates BMDCs in a TLR4-dependent way.**

298 It has been shown that the TLR4 signaling pathway not only depends on the presence of the

299 MyD88 signal adaptor protein but also the TRIF signal adaptor protein (31). As we observed  
300 that both, MyD88 and TRIF are involved in BEA induced BMDC cytokine production, we next  
301 sought to determine whether BEA activates BMDCs in a TLR4 dependent manner. To this end,  
302 we stimulated WT and *Tlr4*-deficient BMDCs with BEA in the presence or absence of CpG or  
303 LPS for 24 hours. Measurement of IL-12p70 and IFN $\beta$  in the supernatant by ELISA showed  
304 that LPS and BEA did not induce IL-12p70 and IFN $\beta$  production in *Tlr4*-deficient BMDCs  
305 (Figure 5A, B). In contrast, CpG induced similar amounts of IL-12p70 and IFN $\beta$  in both WT and  
306 *Tlr4*-deficient BMDCs while BEA co-treatment with CpG failed to induce more cytokine  
307 production as compared to *Tlr4*-deficient BMDCs stimulated with CpG alone, suggesting these  
308 effects of BEA on BMDCs are TLR4 signaling dependent.

309 Furthermore, to investigate whether BEA can activate other TLR signaling pathways, WT and  
310 BMDCs with a triple deficiency of TLR3, 7 and 9 were stimulated by BEA with or without CpG  
311 (TLR9), R848 (TLR7) or Poly I:C (TLR3). Consistent with current knowledge, CpG and R848  
312 can significantly induce IL-12p70 and IFN $\beta$  production in WT, but not in *Tlr3/7/9*-deficient  
313 BMDCs. In addition, we found that Poly I:C did not induce IL-12p70 production, which is  
314 consistent with previous reports (30). In contrast, BEA induced similar amounts of IL-12p70  
315 and IFN $\beta$  in WT and *Tlr3/7/9* deficient BMDCs (Figure 5 C, D).

316 To further determine if BEA could directly activate TLR4-mediated signaling, we stimulated  
317 HEK-293 cells stably expressing mTLR4/CD14/MD2 and transiently expressing the  
318 NF- $\kappa$ B-luciferase reporter and Renilla gene with various concentrations of BEA or LPS as a  
319 positive control and measured NF- $\kappa$ B activation. LPS treatment significantly induced NF- $\kappa$ B  
320 activation, which was similarly observed after BEA treatment (Figure 5E). Taken together, our  
321 data indicate that BEA activates BMDCs via a TLR4 dependent signaling pathway.

### 322 **BEA induces transcriptional changes associated with TLR signaling and chemokine** 323 **signaling pathways.**

324 To define the underlying mechanisms by which BEA activates BMDCs, we used  
325 whole-genome RNA sequencing (RNA-seq) to detect genome wide differences in gene  
326 expression of BMDCs treated with or without BEA in an explorative study. MHC II<sup>high</sup> CD11c<sup>+</sup>

327 BMDCs were sorted by flow cytometry followed by stimulation with BEA or LPS alone or BEA  
328 combined with LPS for 4 hours. Control samples were left untreated. PCA revealed that the  
329 four treatment groups cluster separately and that combined BEA with LPS treatment clusters  
330 in close proximity to that of BEA stimulation alone (Figure 6A). Similarly, heatmap and  
331 hierarchical clustering show that gene expression induced by BEA is different from LPS  
332 stimulation. Combined BEA and LPS stimulation induces a similar differential gene expression  
333 as BEA stimulation sharing differential regulation of endolysosome related gene expression  
334 (Lamp1, Lamp2, Lamtor3, CSTB, Vps35 and Mcoln1), cellular metabolism gene expression  
335 (HK3 and Fasn), mitochondrial gene expression (Polrmt, Slc25a29), autophagy gene  
336 expression (rptor) and transcription regulation (Zfp446, H4c3 and foxf2) (Figure 6B). KEGG  
337 pathway and GO analyses for BEA treated versus untreated BMDCs were enriched in those  
338 involved in “the innate TLR pathway”, “the MyD88 mediated pathway”, “the cytokine signaling  
339 pathway”, “the chemokine signaling pathway”, “response to lipopolysaccharide” and  
340 “regulation of interleukin-6 production”, amongst others, which further confirmed our Multiplex  
341 results (Figure 6C). Using Cytoscape to visualize molecular interaction networks we could  
342 show that BEA, LPS and BEA together with LPS similarly induced regulation of clusters related  
343 to DCs activation and cell cycle progression (Figure 6D and Supplemental Figure 1). In  
344 contrast, BEA led to additional clusters associated with cellular metabolism, T-cell activation,  
345 complement activation, type I IFN response, vaccine response, JAK-STAT signaling,  
346 ribosomes, translation, and autophagy/receptor recycling (Figure 6D). Moreover, BEA with  
347 LPS synergistically and additionally induced B cell antibody production networks and innate  
348 immune response (Supplemental Figure 1). Taken together, our results indicate that BEA  
349 activates BMDCs via a TLR4 dependent signaling pathway, but induces a gene expression  
350 profile different from LPS.

351

## 352 **Discussion**

353 BEA is a natural product found in various toxigenic fungi, for which several biological  
354 effects have been reported, such as cytotoxic, apoptotic, anti-cancer, anti-microbial,

355 insecticidal, and nematicidal activities (14). Moreover, BEA has been reported to exhibit  
356 anti-inflammatory activity in macrophages by inhibiting the NF- $\kappa$ B pathway and in an  
357 experimental colitis model by inhibiting activated T cells (20, 27). However, little is known  
358 about the effect of BEA on DCs. In this study, we showed for the first time that BEA activates  
359 GM-CSF-cultured BMDCs, inducing inflammatory cytokines such as IL-12, IFN $\beta$ , TNF, IL-6  
360 together with CD86 expression in a MyD88 and TRIF-dependent way. Furthermore, BEA can  
361 enhance the ability of BMDCs to induce T cell proliferation, whereas it does not have an impact  
362 on differentiation or induction on cytokine production in individual cells. The purity of isolated  
363 and commercial BEA is above 95% and our PMB-blocking experiments also exclude any  
364 possibility of endotoxin contamination.

365 TLRs are crucial activating receptors on antigen presenting cells including macrophages  
366 and DCs. Upon recognition of PAMPs or DAMPs, they can induce a variety of cellular  
367 responses including production of inflammatory cytokines, chemokines, and type I IFNs. TLR  
368 signaling consists of at least two distinct pathways: a MyD88-dependent pathway that leads to  
369 the production of inflammatory cytokines, and a MyD88-independent pathway associated with  
370 the induction of IFN $\beta$  (5, 33, 34). Signaling downstream of most of TLRs is MyD88-dependent,  
371 except for signaling downstream of TLR3, which is exclusively TRIF-dependent. TLR4 signals  
372 through both, the MyD88- and TRIF-dependent pathway to induce inflammatory cytokines,  
373 chemokines and type I IFNs production (30). To explore the mechanism by which BEA  
374 activates BMDCs, we analyzed inflammatory cytokine and chemokine production by BMDCs  
375 derived from *Myd88*<sup>-/-</sup> or *Myd88*<sup>-/-</sup> *Trif*<sup>-/-</sup> mice after BEA stimulation. Production of cytokines and  
376 chemokines in response to BEA stimulation was strongly diminished in *Myd88*<sup>-/-</sup> BMDCs and  
377 almost undetectable in *Myd88*<sup>-/-</sup> *Trif*<sup>-/-</sup> BMDCs. Thus, these results suggest BEA activates  
378 BMDCs using signaling pathways that are both MyD88- and TRIF-dependent. Thus, we  
379 reasoned that BEA activates BMDCs via activating the TLR4 signaling pathway. To test this,  
380 we analyzed the release of cytokines from *Tlr4*<sup>-/-</sup> BMDCs. BEA significantly decreased  
381 IL-12p70 and IFN $\beta$  production by *Tlr4*<sup>-/-</sup> BMDCs. Consistently, Luciferase Reporter Assay  
382 shows that BEA significantly induced NF- $\kappa$ B activation in HEK-293 cells stably expressing  
383 TLR4/MD2/CD14. Moreover, RNA sequencing and GO analyses showed that BEA-treated

384 BMDCs activate pathways related to TLR signaling, cytokines and inflammatory response,  
385 chemokine signaling, and IL-10 anti-inflammatory signaling, which were similarly activated in  
386 LPS-treated BMDCs. However, also marked differences exist between BEA-treated BMDCs  
387 and LPS-treated BMDCs. BEA-treated BMDCs show regulation of various signatures  
388 associated with cellular metabolism, T cell activation, complement activation, type I IFN  
389 response, vaccine response, JAK-STAT signaling, ribosomes, translation, and  
390 autophagy/receptor recycling, which was not found to the same extent in LPS-stimulated  
391 BMDCs. These differences could be attributed to the different affinity of TLR4 to BEA and LPS  
392 or by additional molecular targets of BEA within the cells. Of note, heat-killed conidia of  
393 *Aspergillus fumigatus* have been reported to activate TLR4 signaling to induce inflammatory  
394 cytokine production (35). However, which component of this fungus is responsible for TLR4  
395 activation was not elucidated. It is tempting to speculate that BEA or a derivative thereof  
396 produced by this fungus is responsible for this TLR4 stimulating activity, but this remains to be  
397 elucidated in future studies.

398 It has been reported that BEA shows cytotoxicity on human DCs derived from human  
399 umbilical cord blood CD14<sup>+</sup> monocytes. Furthermore, BEA can affect LPS-induced DCs  
400 maturation by decreasing CCR7 expression and increasing IL-10 production (36), whereas,  
401 effects of BEA alone on human dendritic cell activation remain unknown. To determine  
402 whether BEA can activate human DCs is the aim of future studies. Furthermore, we found BEA  
403 pre-treated BMDCs could enhance T-cell proliferation, whereas no difference of T-cell  
404 proliferation was observed when BEA was present in the co-culture of BMDCs together with T  
405 cells (data not shown). This could be caused by direct inhibition of T-cell proliferation by BEA  
406 resulting in a neutralization of BMDC-mediated T-cell proliferation (27). Of course, further  
407 studies need to be done to verify effects of BEA *in vivo*. In addition, BEA has been reported to  
408 exhibit anti-inflammatory activity in macrophages by inhibiting the NF- $\kappa$ B pathway (20). To  
409 determine why DCs and macrophages react differently to BEA is another task of future studies.  
410 Also, further studies need to be done to define the molecular mode of action of BEA-mediated  
411 TLR4 stimulation. Direct binding of BEA to TLR4 needs to be tested and if applicable the TLR4  
412 domains involved need to be identified. Alternatively, BEA-mediated TLR4 signalling could be

413 activated via the release or induction of endogenous proteins serving as ligands for TLR4 such  
414 as Mrp8 (37), heat shock proteins (HSP60, 70, Gp96) (38) and high mobility group box 1  
415 protein (HMGB1) (39).

416 Adjuvants are defined as molecules or formulations that enhance the efficacy of vaccines  
417 without directly participating in the protective immunity. In recent decades, a variety of  
418 preclinical and clinical studies have shown that purified TLR agonists could be exploited as  
419 adjuvants to enhance adaptive responses during vaccination (40, 41). Monophosphoryl lipid A  
420 (MPLA), a TLR4 agonist purified from *Salmonella minnesota* LPS has been used as adjuvant  
421 in different vaccines against human papillomavirus (HPV) and hepatitis B virus (HBV)  
422 infections (42). Moreover, MPLA is the only TLR4 agonist that has been clinically tested as an  
423 adjuvant for cancer vaccines (43, 44). In our study, BEA potently activated DCs inducing a  
424 range of inflammatory cytokines and chemokines in addition to MHC II upregulation. By means  
425 of a cell directed delivery of BEA a specific activation of DCs could be achieved circumventing  
426 its suppressive effects on T cell proliferation (27), thus suggesting that BEA can be a very  
427 promising candidate of vaccine adjuvants and cancer immunotherapy. In addition, BEA has  
428 been reported to neutralize the ATP-binding cassette (ABC) transporters, which contributes to  
429 multi-drug resistance in human, nematodes and arthropods (15, 45). Therefore, combinational  
430 therapy using BEA and other drugs can overcome multidrug resistance.

431 In summary, our data revealed a novel function of BEA on DCs in activating inflammatory  
432 cytokine and chemokine production via activating the TLR4 signaling pathway. Our findings  
433 suggest BEA can be exploited in the field of vaccine adjuvants and cancer immunotherapy.

#### 434 **Author contributions**

435 S.S. conceived and supervised the study. X.Y. performed the experiments, analyzed the  
436 results, X.Y., S.S., J.Q and M.U. wrote the manuscript. S.A. performed cell sorting and gave  
437 suggestions to the project. V.S. performed qRT-PCR experiments. L.R. screened natural  
438 products. C.K., H.W., P.L., U.K., J.S. and H.I. provided mice and isolated bone marrow. M.F.  
439 and R.K. isolated BEA and performed purity analyses. C.A. performed the Multiplex  
440 immunoassays. T.W and K.K performed RNA-seq experiments. X.Y., M.Z., J.D., S.B. and A.H.



441 analyzed the RNA-seq data.

#### 442 **Declaration of interest**

443 The authors declare that the research was conducted in the absence of any commercial or  
444 financial relationships that could be construed as a potential conflict of interest.

#### 445 **Data availability statement**

446 RNA sequencing data in this study have been deposited in NCBI Gene Expression Omnibus  
447 under the accession number GSE192689. Related website is:  
448 <https://www.ncbi.nlm.nih.gov/geo/query/acc.cgi?acc=GSE192689>.

#### 449 **Acknowledgement**

450 Computational support of the 'Zentrum für Informations- und Medientechnologie', especially  
451 the HPC team (High Performance Computing) at the Heinrich-Heine University is  
452 acknowledged. This work was funded by the Deutsche Forschungsgemeinschaft (DFG,  
453 German Research Foundation) DFG-270650915/GRK 2158 to S.S., by the Deutsche  
454 Forschungsgemeinschaft (DFG; German Research Foundation) -398066876/GRK 2485/1 to  
455 U.K., by the Deutsche Forschungsgemeinschaft (DFG; German Research Foundation)  
456 DFG-158989968 – DFB 900-B2 to U.K., by the Deutsche Forschungsgemeinschaft (DFG;  
457 German Research Foundation) under Germany's Excellence Strategy – EXC 2155 "RESIST"  
458 – Project ID 39087428 to U.K.

#### 459 **References**

- 460 1. Banchereau J, Briere F, Caux C, Davoust J, Lebecque S, Liu YJ, et al. Immunobiology of  
461 dendritic cells. *Annu Rev Immunol.* 2000;18:767-811.
- 462 2. Liu J, Zhang X, Cheng Y, Cao X. Dendritic cell migration in inflammation and immunity.  
463 *Cell Mol Immunol.* 2021;18(11):2461-71.
- 464 3. Steinman RM. Decisions about dendritic cells: past, present, and future. *Annu Rev*

- 465 Immunol. 2012;30:1-22.
- 466 4. Iwasaki A, Medzhitov R. Toll-like receptor control of the adaptive immune responses. Nat  
467 Immunol. 2004;5(10):987-95.
- 468 5. Behzadi P, Garcia-Perdomo HA, Karpinski TM. Toll-Like Receptors: General Molecular  
469 and Structural Biology. J Immunol Res. 2021;2021:9914854.
- 470 6. Piqueras B, Connolly J, Freitas H, Palucka AK, Banchereau J. Upon viral exposure,  
471 myeloid and plasmacytoid dendritic cells produce 3 waves of distinct chemokines to recruit  
472 immune effectors. Blood. 2006;107(7):2613-8.
- 473 7. Foti M, Granucci F, Aggujaro D, Liboi E, Luini W, Minardi S, et al. Upon dendritic cell (DC)  
474 activation chemokines and chemokine receptor expression are rapidly regulated for  
475 recruitment and maintenance of DC at the inflammatory site. Int Immunol. 1999;11(6):979-86.
- 476 8. Hilligan KL, Ronchese F. Antigen presentation by dendritic cells and their instruction of  
477 CD4+ T helper cell responses. Cell Mol Immunol. 2020;17(6):587-99.
- 478 9. Trinchieri G. Interleukin-12 and the regulation of innate resistance and adaptive immunity.  
479 Nat Rev Immunol. 2003;3(2):133-46.
- 480 10. Logrieco A, Moretti A, Castella G, Kostecki M, Golinski P, Ritieni A, et al. Beauvericin  
481 production by *Fusarium* species. Appl Environ Microbiol. 1998;64(8):3084-8.
- 482 11. Peczyńska-Czoch W, Urbanczyk MJ, Balazy S. Formation of beauvericin by selected  
483 strains of *Beauveria bassiana*. Arch Immunol Ther Exp (Warsz). 1991;39(1-2):175-9.
- 484 12. Han X, Xu W, Zhang J, Xu J, Li F. Natural Occurrence of Beauvericin and Enniatins in  
485 Corn- and Wheat-Based Samples Harvested in 2017 Collected from Shandong Province,  
486 China. Toxins. 2018;11(1).
- 487 13. Juan C, Manes J, Raiola A, Ritieni A. Evaluation of beauvericin and enniatins in Italian  
488 cereal products and multicereal food by liquid chromatography coupled to triple quadrupole

- 489 mass spectrometry. *Food chemistry*. 2013;140(4):755-62.
- 490 14. Wu Q, Patocka J, Nepovimova E, Kuca K. A Review on the Synthesis and Bioactivity  
491 Aspects of Beauvericin, a Fusarium Mycotoxin. *Front Pharmacol*. 2018;9:1338.
- 492 15. Al Khoury C, Nemer N, Nemer G. Beauvericin potentiates the activity of pesticides by  
493 neutralizing the ATP-binding cassette transporters in arthropods. *Scientific reports*.  
494 2021;11(1):10865.
- 495 16. Xu L, Wang J, Zhao J, Li P, Shan T, Wang J, et al. Beauvericin from the endophytic fungus,  
496 *Fusarium redolens*, isolated from *Dioscorea zingiberensis* and its antibacterial activity. *Nat*  
497 *Prod Commun*. 2010;5(5):811-4.
- 498 17. Shin CG, An DG, Song HH, Lee C. Beauvericin and enniatins H, I and MK1688 are new  
499 potent inhibitors of human immunodeficiency virus type-1 integrase. *J Antibiot (Tokyo)*.  
500 2009;62(12):687-90.
- 501 18. Lim HN, Jang JP, Shin HJ, Jang JH, Ahn JS, Jung HJ. Cytotoxic Activities and Molecular  
502 Mechanisms of the Beauvericin and Beauvericin G1 Microbial Products against Melanoma  
503 Cells. *Molecules*. 2020;25(8).
- 504 19. Ferrer E, Juan-Garcia A, Font G, Ruiz MJ. Reactive oxygen species induced by  
505 beauvericin, patulin and zearalenone in CHO-K1 cells. *Toxicol In Vitro*. 2009;23(8):1504-9.
- 506 20. Yoo S, Kim MY, Cho JY. Beauvericin, a cyclic peptide, inhibits inflammatory responses in  
507 macrophages by inhibiting the NF-kappaB pathway. *The Korean journal of physiology &*  
508 *pharmacology : official journal of the Korean Physiological Society and the Korean Society of*  
509 *Pharmacology*. 2017;21(4):449-56.
- 510 21. Reinhardt RL, Hong S, Kang SJ, Wang ZE, Locksley RM. Visualization of IL-12/23p40 in  
511 vivo reveals immunostimulatory dendritic cell migrants that promote Th1 differentiation. *J*  
512 *Immunol*. 2006;177(3):1618-27.
- 513 22. Love MI, Huber W, Anders S. Moderated estimation of fold change and dispersion for

- 514 RNA-seq data with DESeq2. *Genome Biol.* 2014;15(12):550.
- 515 23. Mootha VK, Lindgren CM, Eriksson KF, Subramanian A, Sihag S, Lehar J, et al.  
516 PGC-1alpha-responsive genes involved in oxidative phosphorylation are coordinately  
517 downregulated in human diabetes. *Nat Genet.* 2003;34(3):267-73.
- 518 24. Subramanian A, Tamayo P, Mootha VK, Mukherjee S, Ebert BL, Gillette MA, et al. Gene  
519 set enrichment analysis: a knowledge-based approach for interpreting genome-wide  
520 expression profiles. *Proc Natl Acad Sci U S A.* 2005;102(43):15545-50.
- 521 25. Shannon P, Markiel A, Ozier O, Baliga NS, Wang JT, Ramage D, et al. Cytoscape: a  
522 software environment for integrated models of biomolecular interaction networks. *Genome*  
523 *Res.* 2003;13(11):2498-504.
- 524 26. Merico D, Isserlin R, Stueker O, Emili A, Bader GD. Enrichment map: a network-based  
525 method for gene-set enrichment visualization and interpretation. *PLoS One.*  
526 2010;5(11):e13984.
- 527 27. Wu XF, Xu R, Ouyang ZJ, Qian C, Shen Y, Wu XD, et al. Beauvericin ameliorates  
528 experimental colitis by inhibiting activated T cells via downregulation of the PI3K/Akt signaling  
529 pathway. *PloS one.* 2013;8(12):e83013.
- 530 28. Deng SL, Zhang BL, Reiter RJ, Liu YX. Melatonin Ameliorates Inflammation and  
531 Oxidative Stress by Suppressing the p38MAPK Signaling Pathway in LPS-Induced Sheep  
532 Orchitis. *Antioxidants (Basel).* 2020;9(12).
- 533 29. Anand G, Perry AM, Cummings CL, Raymond E, Clemens RA, Steed AL. Surface  
534 Proteins of SARS-CoV-2 Drive Airway Epithelial Cells to Induce IFN-Dependent Inflammation.  
535 *J Immunol.* 2021.
- 536 30. Krummen M, Balkow S, Shen L, Heinz S, Loquai C, Probst HC, et al. Release of IL-12 by  
537 dendritic cells activated by TLR ligation is dependent on MyD88 signaling, whereas TRIF  
538 signaling is indispensable for TLR synergy. *Journal of leukocyte biology.* 2010;88(1):189-99.

- 539 31. Shen H, Tesar BM, Walker WE, Goldstein DR. Dual signaling of MyD88 and TRIF is  
540 critical for maximal TLR4-induced dendritic cell maturation. *Journal of immunology*.  
541 2008;181(3):1849-58.
- 542 32. Bandow K, Kusuyama J, Shamoto M, Kakimoto K, Ohnishi T, Matsuguchi T. LPS-induced  
543 chemokine expression in both MyD88-dependent and -independent manners is regulated by  
544 Cot/Tpl2-ERK axis in macrophages. *FEBS letters*. 2012;586(10):1540-6.
- 545 33. Hemmi H, Akira S. TLR signalling and the function of dendritic cells. *Chem Immunol*  
546 *Allergy*. 2005;86:120-35.
- 547 34. Kawai T, Akira S. Toll-like receptor downstream signaling. *Arthritis Res Ther*.  
548 2005;7(1):12-9.
- 549 35. Netea MG, Warris A, Van der Meer JW, Fenton MJ, Verver-Janssen TJ, Jacobs LE, et al.  
550 *Aspergillus fumigatus* evades immune recognition during germination through loss of toll-like  
551 receptor-4-mediated signal transduction. *The Journal of infectious diseases*.  
552 2003;188(2):320-6.
- 553 36. Ficheux AS, Sibiril Y, Parent-Massin D. Effects of beauvericin, enniatin b and moniliformin  
554 on human dendritic cells and macrophages: an in vitro study. *Toxicon*. 2013;71:1-10.
- 555 37. Vogl T, Tenbrock K, Ludwig S, Leukert N, Ehrhardt C, van Zoelen MA, et al. Mrp8 and  
556 Mrp14 are endogenous activators of Toll-like receptor 4, promoting lethal, endotoxin-induced  
557 shock. *Nat Med*. 2007;13(9):1042-9.
- 558 38. Tsan MF, Gao B. Endogenous ligands of Toll-like receptors. *Journal of leukocyte biology*.  
559 2004;76(3):514-9.
- 560 39. Al-Ofi EA, Al-Ghamdi BS. High-mobility group box 1, an endogenous ligand of toll-like  
561 receptors 2 and 4, induces astroglial inflammation via nuclear factor kappa B pathway. *Folia*  
562 *Morphol (Warsz)*. 2019;78(1):10-6.
- 563 40. Kumar S, Sunagar R, Gosselin E. Bacterial Protein Toll-Like-Receptor Agonists: A Novel

564 Perspective on Vaccine Adjuvants. *Front Immunol.* 2019;10:1144.

565 41. Maisonneuve C, Bertholet S, Philpott DJ, De Gregorio E. Unleashing the potential of  
566 NOD- and Toll-like agonists as vaccine adjuvants. *Proc Natl Acad Sci U S A.*  
567 2014;111(34):12294-9.

568 42. Taleghani N, Bozorg A, Azimi A, Zamani H. Immunogenicity of HPV and HBV vaccines:  
569 adjuvanticity of synthetic analogs of monophosphoryl lipid A combined with aluminum  
570 hydroxide. *APMIS.* 2019;127(3):150-7.

571 43. Shetab Boushehri MA, Lamprecht A. TLR4-Based Immunotherapeutics in Cancer: A  
572 Review of the Achievements and Shortcomings. *Mol Pharm.* 2018;15(11):4777-800.

573 44. Cluff CW. Monophosphoryl lipid A (MPL) as an adjuvant for anti-cancer vaccines: clinical  
574 results. *Adv Exp Med Biol.* 2010;667:111-23.

575 45. Wu C, Chakrabarty S, Jin M, Liu K, Xiao Y. Insect ATP-Binding Cassette (ABC)  
576 Transporters: Roles in Xenobiotic Detoxification and Bt Insecticidal Activity. *International*  
577 *journal of molecular sciences.* 2019;20(11).

578

579

## 580 **Figure legend**

### 581 **Figure 1. Effects of BEA on BMDCs.**

582 **(A, B)**  $5 \times 10^5$  BMDCs from IL-12p40/GFP reporter mice were stimulated with indicated  
583 concentration of BEA with or without LPS (10 ng/ml) and CpG2216 (0.5  $\mu$ M) for 16 hours.  
584 IL-12p40/GFP **(A)** and CD86 expression **(B)** by BMDCs were detected by flow cytometry. **(C)**  
585  $10^6$  BMDCs were stimulated with 5  $\mu$ M BEA for the indicated time. IL-12p40, IFN $\beta$ , TNF and  
586 IL-6 were analyzed by Real time PCR. Data are shown as mean  $\pm$  SEM. Results shown are  
587 representative of two to three independent experiments. \* $p < 0.05$ , \*\* $p < 0.01$ , \*\*\* $p < 0.001$ , ns: not  
588 significant.

589

### 590 **Figure 2. BEA-treated BMDCs enhance T cell proliferation.**

591  $10^5$  naïve  $CD4^+$  T cells derived from OT II TCR transgenic mice were labeled with CellTrace  
592 Violet and cultured with  $10^4$  untreated or BEA-treated BMDCs for 3 days. **(A)** T cell  
593 proliferation was analyzed by flow cytometry based on CellTrace Violet dilution. **(B)**  $10^5$  naïve  
594 OT II  $CD4^+$  T cells were labeled with CellTrace Violet and cultured with  $10^4$  untreated or  
595 BEA-treated BMDCs for 5 days. Percentage of IFN $\gamma$  production by  $CD4^+$  T cells was measured  
596 by intracellular staining. **(C)** IFN $\gamma$  production in the supernatant was detected by ELISA. Data  
597 are shown as mean  $\pm$  SEM. One representative experiment is shown out of two independent  
598 experiments. \*\* $p < 0.01$ , \*\*\* $p < 0.001$ , ns: not significant.

599

### 600 **Figure 3. Exclusion of BEA contamination with LPS.**

601 **(A, B)**  $5 \times 10^5$  BMDCs derived from IL-12p40/GFP reporter mice were stimulated with 5  $\mu$ M BEA  
602 or LPS (10 ng/ml) with or without PMB (100 ng/ml). After 16 hours of stimulation,  
603 IL-12p40/GFP and CD86 expression of BMDCs were analyzed by flow cytometry. **(C)**  $10^6$   
604 BMDCs derived from IL-12p40/GFP reporter mice were stimulated by 5  $\mu$ M BEA or LPS (10  
605 ng/ml) with or without PMB (100 ng/ml). After 24 hours of stimulation, supernatants were  
606 analyzed for IL-12p70 by ELISA. Results shown are representative of two independent  
607 experiments. \*\*\* $p < 0.001$ , ns: not significant.

608

### 609 **Figure 4. BEA promotes BMDC activation in a MyD88/TRIF dependent manner.**

610  $10^6$  BMDCs from WT, *Myd88*<sup>-/-</sup> and *Myd88*<sup>-/-</sup> *Trif*<sup>-/-</sup> mice were stimulated with 5  $\mu$ M BEA, LPS  
611 (10 ng/ml) and cGAMP (10 ng/ml) as control. After 24 hours of stimulation, supernatants were  
612 analyzed for IL-12p70 and IFN $\beta$  production by ELISA **(A)**, and inflammatory cytokine (TNF,  
613 IL-6, IL-1 $\beta$ , IL-27, IL-10) **(B)** and chemokine production (GRO-alpha, IP-10, MCP-3, ENA-78,  
614 MIP-1 $\alpha$  and RANTES) **(C)** by Multiplex immunoassays. Results shown are representative of  
615 two independent experiments. \* $p < 0.05$ , \*\* $p < 0.01$ , \*\*\* $p < 0.001$ , ns: not significant.

616

### 617 **Fig 5. BEA activates BMDCs via TLR4.**

618 **(A, B)**  $10^6$  BMDCs derived from WT and *Tlr4*<sup>-/-</sup> mice were stimulated with 5  $\mu$ M BEA with or  
619 without LPS (10 ng/ml) and CpG (0.5  $\mu$ M). After 24 hours of stimulation, supernatants were  
620 analyzed for IL-12p70 and IFN $\beta$  by ELISA. **(C, D)**  $1 \times 10^6$  BMDCs derived from WT and

621 *Tlr3/7/9*<sup>-/-</sup> mice were stimulated with 5 μM BEA with or without LPS (10 ng/ml), CpG (0.5 μM),  
622 R848 (1 μg/ml), or Poly I:C (25 ng/ml). After 24 hours of stimulation, supernatants were  
623 analyzed for IL-12p70 and IFNβ by ELISA. Results shown are representative of two  
624 independent experiments. **(E)** 3.5x10<sup>4</sup> HEK-293 cells stably expressing mTLR4/CD14/MD2  
625 were transiently transfected with firefly luciferase NF-κB reporter and Renilla plasmids. After  
626 24 hours, transfected HEK-293 were treated with indicated concentrations of BEA and LPS (1  
627 μg/ml) as positive control and induction of NF-κB was determined by luciferase activity.  
628 Results shown are representative of three independent experiments. \*p<0.05, \*\*p<0.01,  
629 \*\*\*p<0.001, ns: not significant.

630

631 **Figure 6. BEA promotes transcriptional changes associated with chemokine and**  
632 **cytokine production and TLR signaling pathway activation but are distinct from LPS**  
633 **stimulation.**

634 MHC II<sup>high</sup> CD11c<sup>+</sup> BMDCs sorted by flow cytometry were followed by stimulation with BEA (5  
635 μM) or LPS (1 μg/ml) alone or BEA combined with LPS for 4 hours. **(A)** PCA of the  
636 quadruplicate biological replicates of each condition. **(B)** Heatmap showing expression profile  
637 for 4,015 genes that were found to be significantly regulated in at least one of the comparisons  
638 using untreated as baseline condition. **(C)** Enriched Reactome pathways (upper plot) and  
639 biological process (lower plot) in DEGs in BEA treated BMDCs compared with untreated  
640 BMDCs. **(D)** Cytoscape representation of significantly enriched signatures in BEA treated  
641 BMDCs compared with untreated BMDCs.

642

643 **Supplemental Figure 1**

644 **(A)** Cytoscape representation of significantly enriched signatures in LPS treated BMDCs  
645 compared with untreated BMDCs. **(B)** Cytoscape representation of significantly enriched  
646 signatures in BEA with LPS treated BMDCs compared with untreated BMDCs.



# Figure 1

**A**

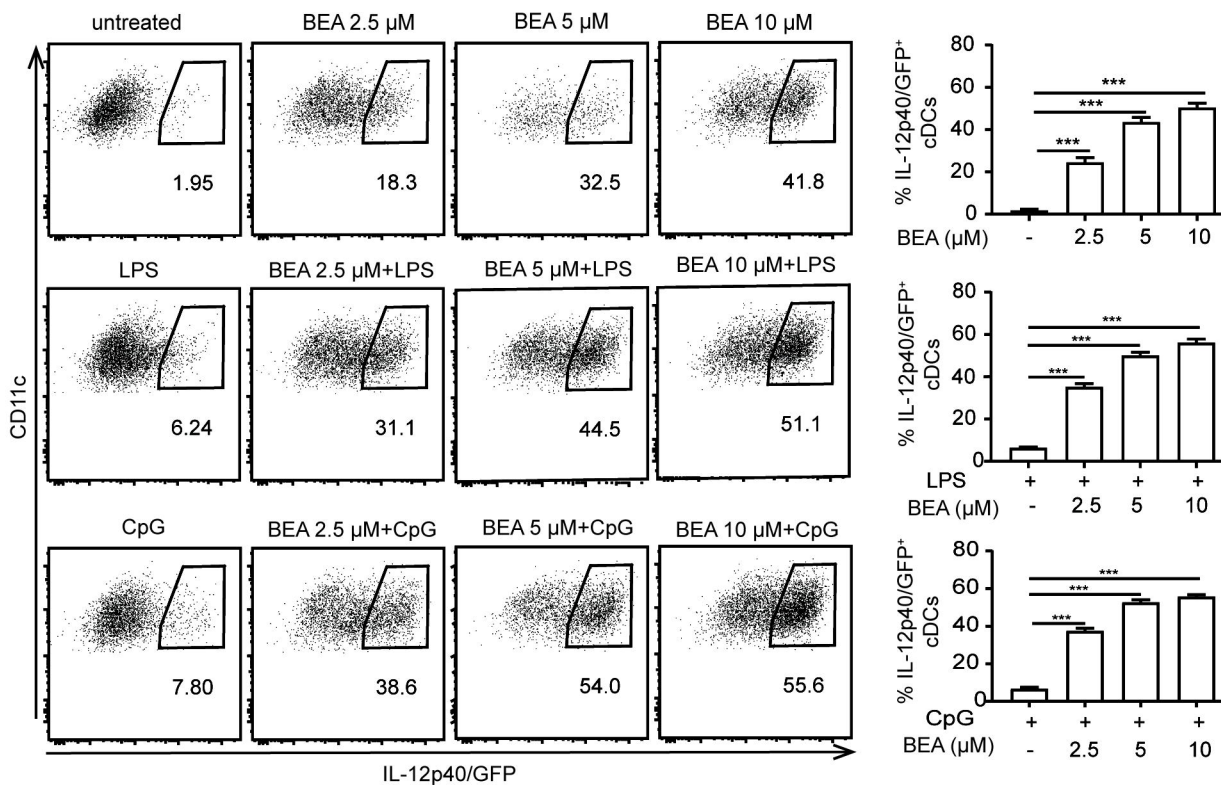

**B**

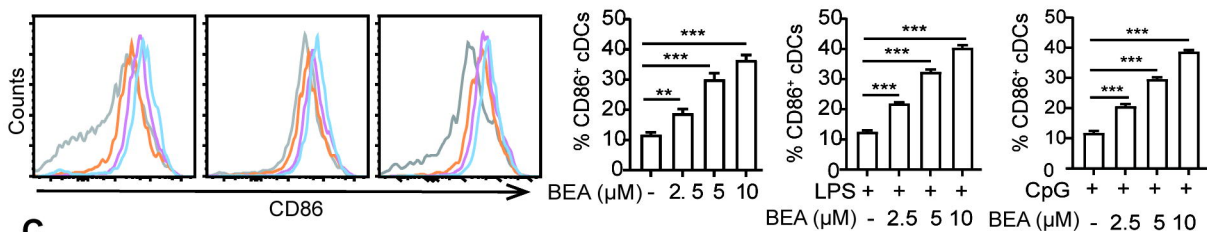

**C**

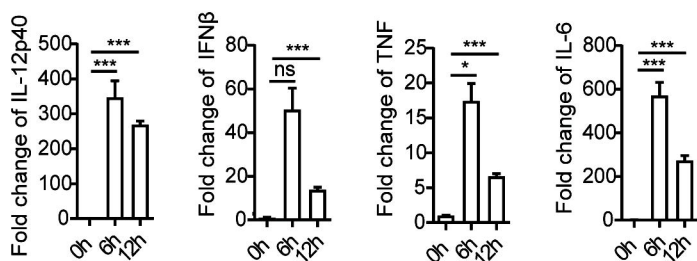

# Figure 2

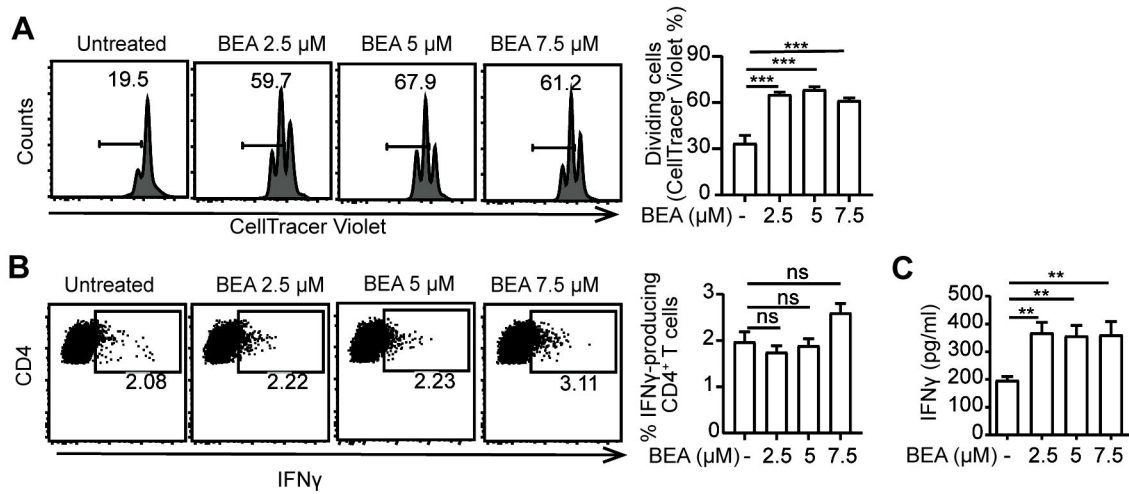



# Figure 4

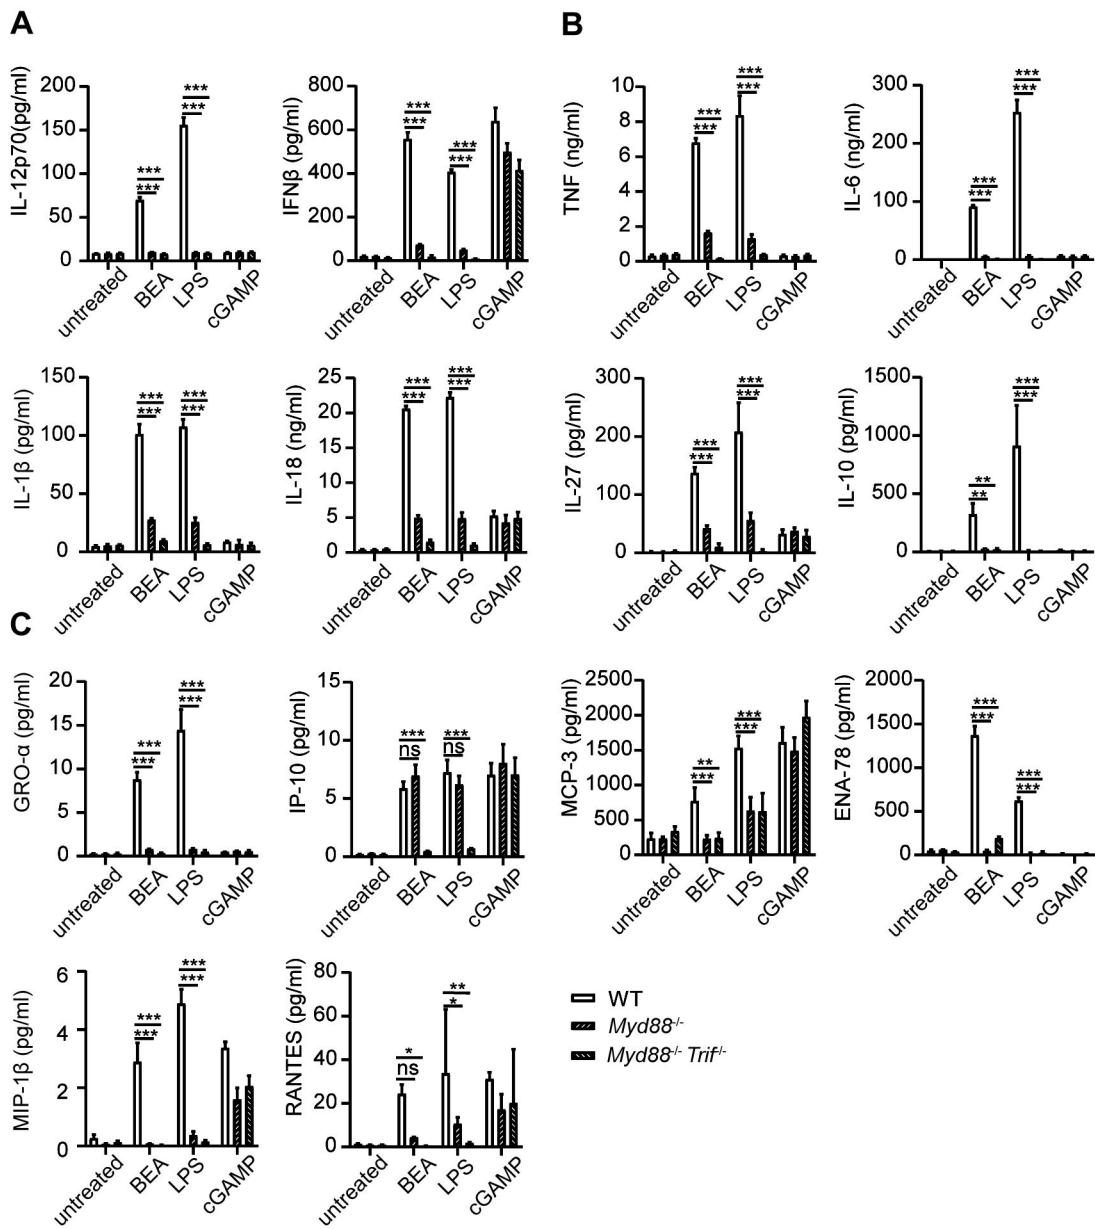

## Figure 5

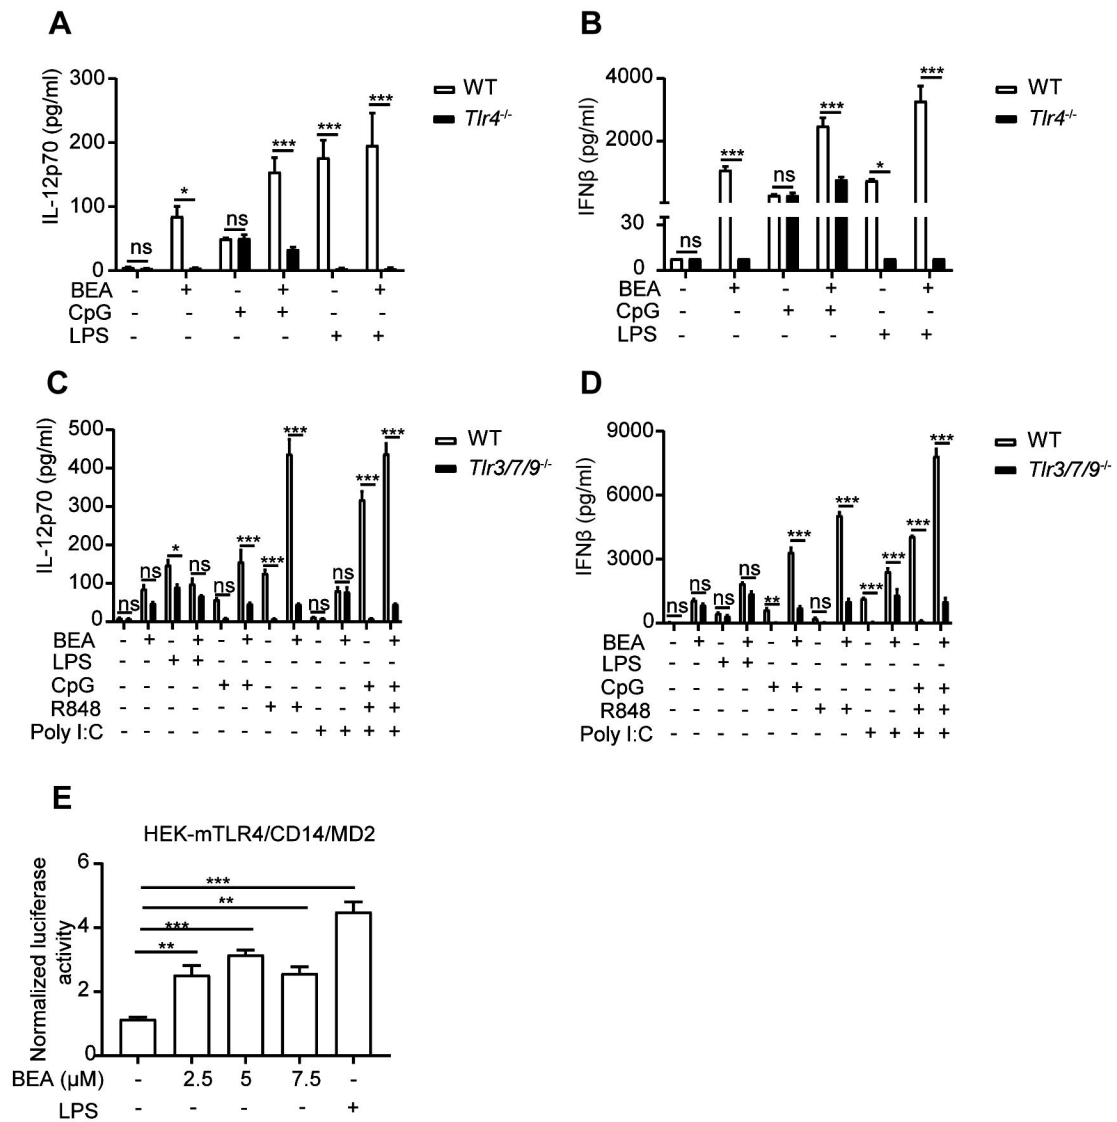

# Figure 6

**A**

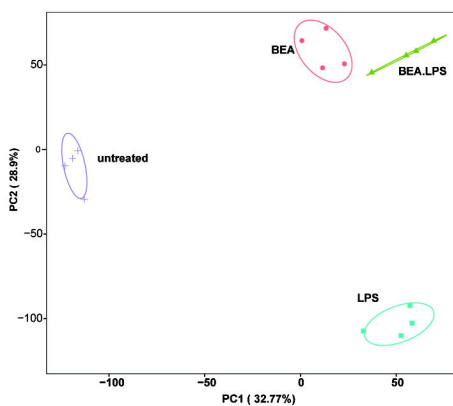

**B**

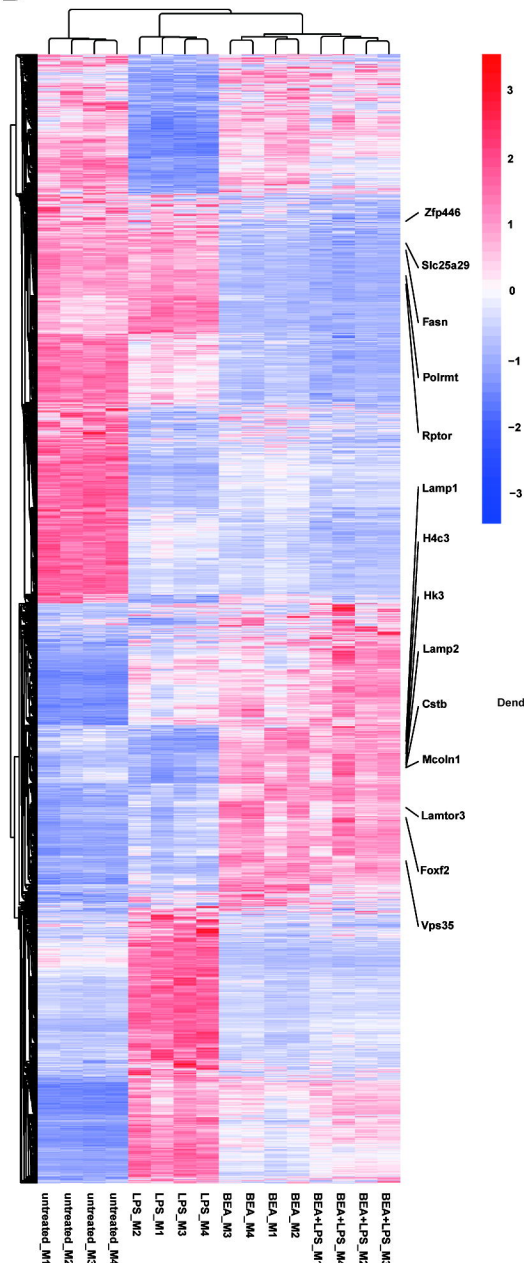

**C**

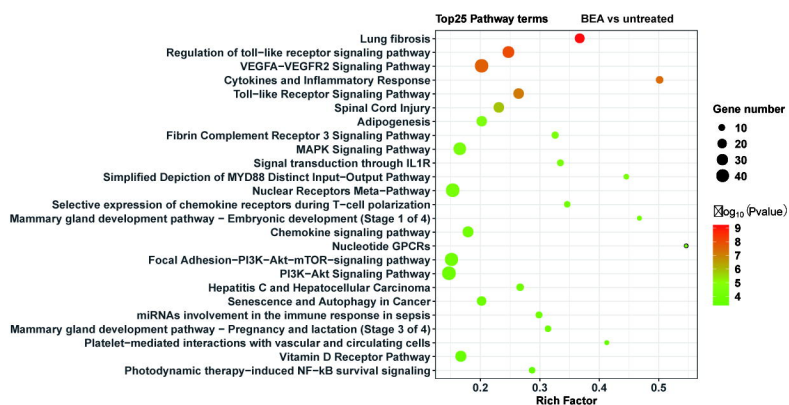

**D**

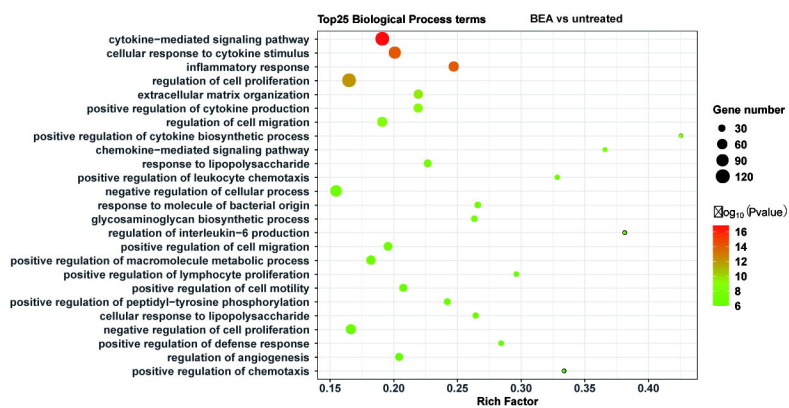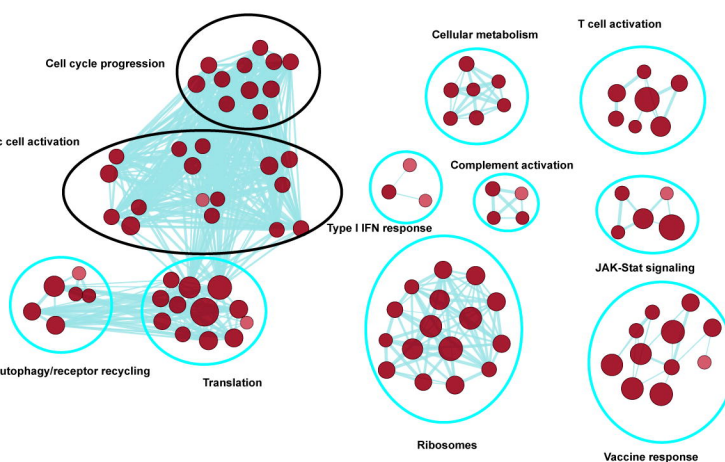

BEA vs untreated

# Supplemental Figure 1

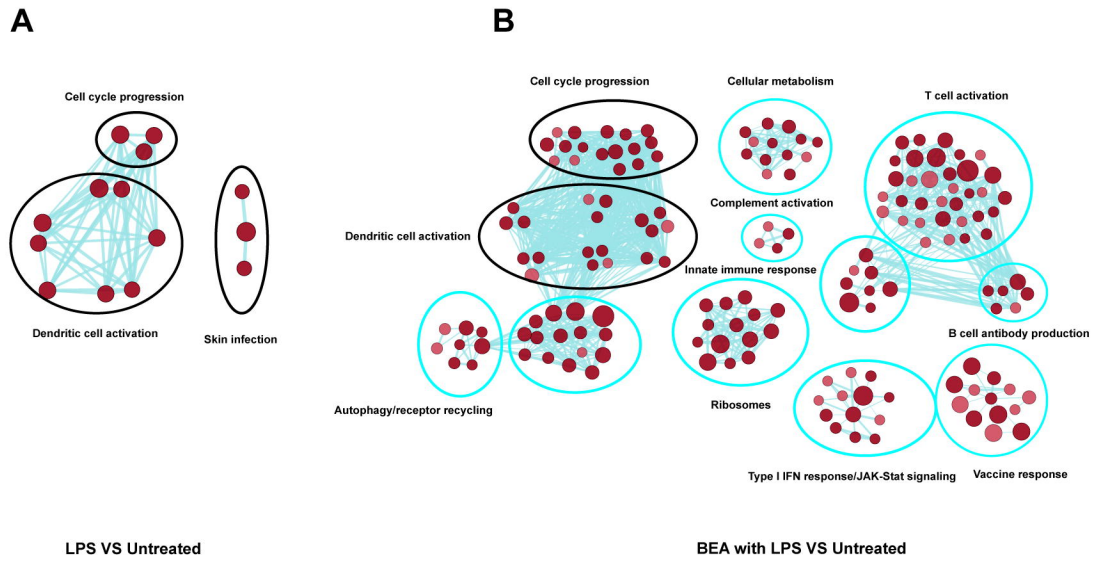

Source: http://biorxiv.org/content/10.1101/2022.01.20.476919v1.full.pdf
